# Supplementary material for: Role of NEAT1/MiR-9-5p/SLC26A2 Pathway on Human Airway Smooth Muscle Cell
Source: PubMed Central journal article supplement — Yonsei Med J. 2021 Aug 17;62(9):858–67. doi: 10.3349/ymj.2021.62.9.858 (PMC8382724; doi:10.3349/ymj.2021.62.9.858), 2021-08-17
Supplement: ymj-62-858-s001.pdf [file ymj-62-858-s001.pdf]

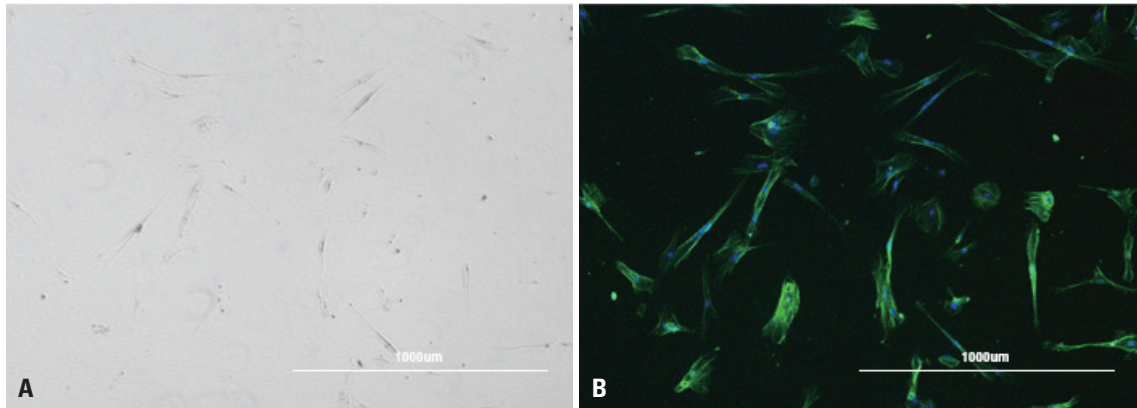

**Supplementary Fig. 1.** The identification of HASMCs. (A) Morphological and phenotypic identification of cultured HASMCs (original magnification:  $\times 100$ ). The typical peak and valley growth pattern of HASMCs. (B) Immunofluorescence staining of positive expression of  $\alpha$ -SMA (green-fluorescence) in HASMCs. HASMCs, human airway smooth muscle cells;  $\alpha$ -SMA,  $\alpha$ -smooth muscle actin.
